# Supplementary material
Source: ML conference proceedings conference paper supplement (https://openreview.net/forum?id=4qPAOYjSlx)
Supplement: supplementary_material [file hamp_supplementary.pdf › hamp_supplementary.pdf]

## A Algorithms

**Complexity Analysis.** Here, we analyze the computational complexity of one layer in HAMP-I and HAMP-II. Analytically, the time complexity is  $\mathcal{O}(|\mathcal{V}||\mathcal{E}|c^2 + |\mathcal{V}|c)$ , where  $|\mathcal{V}|$ ,  $|\mathcal{E}|$  and  $c$  are the number of nodes, number of hyperedges and number of hidden dimension, respectively. However, the incidence matrix  $\mathbf{H}$  is a sparse matrix, so the time complexity is  $\mathcal{O}((tr(\mathbf{D}_v) + tr(\mathbf{D}_e))c^2 + |\mathcal{V}|c)$ , where  $tr(\mathbf{D}_v)$  is the sum of the degrees of all nodes and  $tr(\mathbf{D}_e)$  is the sum of the number of nodes contained in all hyperedges. The detailed process of HAMP-I and HAMP-II are shown in Algorithm 1 and Algorithm 2.

---

**Algorithm 1** The HAMP-I Algorithm for Hypergraph Node Classification.

---

- 1: **Input:** the incidence matrix  $\mathbf{H}$ , the node feature  $\mathbf{X}$ , and the node labels  $\mathbf{Y}$ .
  - 2: **Output:** the model prediction accuracy.
  - 3: **Initialization:** the time  $T$ , the step size  $\tau$  and all parameters of model.
  - 4: **while** not converged **do**
  - 5:   Node feature mapping  $\mathbf{X} = \text{Linear}_{\text{map}}(\mathbf{X})$ ;
  - 6:   Set the initial time  $t = 0$ , the initial node representation  $\mathbf{X}(0) = \mathbf{X}$ ;
  - 7:   **while**  $t \leq T$  **do**
  - 8:     Message passing from  $\mathcal{V}$  to  $\mathcal{E}$ :  $\mathbf{X}_{\mathcal{V} \rightarrow \mathcal{E}}(t) = \Phi_1(\mathbf{X}(t), \mathbf{H})$ ;
  - 9:     Message passing from  $\mathcal{E}$  to  $\mathcal{V}$ :  $\mathbf{X}_{\mathcal{E} \rightarrow \mathcal{V}}(t) = \Psi(\mathbf{X}(t), \Phi_2(\mathbf{X}_{\mathcal{V} \rightarrow \mathcal{E}}(t), \mathbf{H}))$ ;
  - 10:    Compute particle dynamics as
 
$$\mathbf{X}(t + \tau) = \mathbf{X}(t) + \tau \sigma \left( \underbrace{\mathbf{X}_{\mathcal{E} \rightarrow \mathcal{V}}(t) - \omega \mathbf{X}(t)}_{\text{Interaction Force}} + \underbrace{\delta f_d(\mathbf{X}(t))}_{\text{Allen-Cahn Force}} + \underbrace{\epsilon \mathbf{B}(t)}_{\text{Noise}} + \beta \mathbf{X}(0) \right);$$
  - 11:    Udata  $t = t + \tau$ ;
  - 12:   **end while**
  - 13:   Input the node representation into the classifier  $\mathbf{X}^{out} = \text{MLP}(\mathbf{X}(T))$ ;
  - 14:   Compute the model prediction labels  $\hat{\mathbf{Y}} = \text{Softmax}(\mathbf{X}^{out})$  and compute the loss function;
  - 15:   Update all parameter by back propagation using the Adam optimizer;
  - 16: **end while**
- 

---

**Algorithm 2** The HAMP-II Algorithm for Hypergraph Node Classification.

---

- 1: **Input:** the incidence matrix  $\mathbf{H}$ , the node feature  $\mathbf{X}$ , and the node labels  $\mathbf{Y}$ .
  - 2: **Output:** the model prediction accuracy.
  - 3: **Initialization:** the time  $T$ , the step size  $\tau$  and all parameters of model.
  - 4: **while** not converged **do**
  - 5:   Node feature mapping  $\mathbf{X} = \text{Linear}_{\text{map}}(\mathbf{X})$ ;
  - 6:   Set the initial time  $t = 0$ , the initial node representation  $\mathbf{X}(0) = \mathbf{X}$ ;
  - 7:   Set the initial velocity  $\mathbf{V}(0) = \text{Linear}(\mathbf{X}(0)) - \mathbf{X}(0)$ ;
  - 8:   **while**  $t \leq T$  **do**
  - 9:     Message passing from  $\mathcal{V}$  to  $\mathcal{E}$ :  $\mathbf{V}_{\mathcal{V} \rightarrow \mathcal{E}}(t) = \Phi_1(\mathbf{V}(t), \mathbf{H})$ ;
  - 10:    Message passing from  $\mathcal{E}$  to  $\mathcal{V}$ :  $\mathbf{V}_{\mathcal{E} \rightarrow \mathcal{V}}(t) = \Psi(\mathbf{V}(t), \Phi_2(\mathbf{V}_{\mathcal{V} \rightarrow \mathcal{E}}(t), \mathbf{H}))$ ;
  - 11:    Compute the velocity of particle dynamics system as
 
$$\mathbf{V}(t + \tau) = \mathbf{V}(t) + \tau \sigma \left( \underbrace{\mathbf{V}_{\mathcal{E} \rightarrow \mathcal{V}}(t) - \omega \mathbf{V}(t)}_{\text{Interaction Force}} + \underbrace{\delta f_d(\mathbf{V}(t))}_{\text{Allen-Cahn Force}} + \underbrace{\epsilon \mathbf{B}(t)}_{\text{Noise}} + \beta \mathbf{V}(0) \right);$$
  - 12:    Compute the representation by  $\mathbf{X}(t + \tau) = \mathbf{X}(t) + \tau \mathbf{V}(t + \tau)$ ;
  - 13:    Udata  $t = t + \tau$ ;
  - 14:   **end while**
  - 15:   Input the node representation into the classifier  $\mathbf{X}^{out} = \text{MLP}(\mathbf{X}(T))$ ;
  - 16:   Compute the model prediction labels  $\hat{\mathbf{Y}} = \text{Softmax}(\mathbf{X}^{out})$  and compute the loss function;
  - 17:   Update all parameter by back propagation using the Adam optimizer;
  - 18: **end while**
-

**Limitations Discussion.** Our particle dynamics-based hypergraph message passing framework assumes a static hypergraph topology. While this assumption is valid for social and biological hypergraphs with slowly evolving interactions, it may not hold in highly dynamic scenarios like financial transaction networks, where hyperedge topologies change abruptly. Consequently, effectively modeling temporal hypergraphs with evolving structures remains an open challenge.

## B Theoretical Results and Proof

Technically, we suppose there exists  $\{f_\beta^e\}$  such that  $\mathcal{I} = \{1, \dots, N\}$  can be divided into two disjoint groups with  $N_1, N_2$  particles respectively:  $f_\beta(h_{i,j}^e) \geq 0$ , for  $\{i, j\} \in \mathcal{I}_1$  or  $\mathcal{I}_2$  and  $f_\beta(h_{i,j}^e) \leq 0$ , otherwise. We designate

$$\{x_i^{(1)}\} := \{\mathbf{x}_i | i \in \mathcal{I}_1\}, \quad \{x_j^{(2)}\} := \{\mathbf{x}_j | j \in \mathcal{I}_2\}. \quad (11)$$

The model is channel-wise, hence we use  $x$  instead of  $\mathbf{x}$  in the proof.

First, let's define the relevant notation,

The mean value:

$$\bar{x} := \frac{1}{N} \sum_{i=1}^N x_i. \quad (12)$$

The deviation values:

$$\hat{x}_i := x_i - \bar{x}. \quad (13)$$

The variance of values within each group:

$$\text{var}(x^{(1)}) = \frac{1}{N_1} \sum (\hat{x}_i^{(1)})^2, \quad \text{var}(x^{(2)}) = \frac{1}{N_2} \sum (\hat{x}_i^{(2)})^2. \quad (14)$$

The second moments:

$$M_2(x^{(1)}) := \sum_{i=1}^{N_1} (x_i^{(1)})^2, \quad M_2(x^{(2)}) := \sum_{i=1}^{N_2} (x_i^{(2)})^2. \quad (15)$$

And others:

$$\widehat{M}_2 := M_2(\hat{x}^{(1)}) + M_2(\hat{x}^{(2)}) = \text{var}(x^{(1)}) + \text{var}(x^{(2)}). \quad (16)$$

$$\psi_i^{e,\pm} := \sum_{j \in e} h_{i,j}^{e,\pm}, \quad \psi_i^\pm := \sum_{e \in \mathcal{E}} \sum_{j \in e} h_{i,j}^{e,\pm}. \quad (17)$$

$$k := \max_i \{|\mathcal{E}(i)|\}. \quad (18)$$

$$D_e^- := \max_k \{\psi_k^{e,-}\}, \quad D_e^- := \max_e \{D_e^-\}. \quad (19)$$

$$D_2^- := \max_e \{\|\psi^{e,-}\|_2\}. \quad (20)$$

Technically, we set  $N_1 = N_2 := N_0$ . This assumption is that  $N_1$  is comparable to  $N_2$ , i.e., there exists a positive constant  $\kappa$  satisfying  $\frac{1}{\kappa} N_1 \leq N_2 \leq \kappa N_1$ .

We can rewrite Eq. 4 as

$$\begin{cases} \dot{u}_i^{(1)} = \frac{1}{N_1} \sum_{e \in \mathcal{E}(i)} \sum_{i'=1}^{N_1} h_{i,i'}^{e,+} (x_{i'}^{(1)} - x_i^{(1)}) - \frac{1}{N_2} \sum_{e \in \mathcal{E}(i)} \sum_{j=1}^{N_2} h_{i,j}^{e,-} (x_j^{(2)} - x_i^{(1)}) + \delta x_i^{(1)} (1 - (x_i^{(1)})^2) \\ \dot{v}_j^{(2)} = \frac{1}{N_2} \sum_{e \in \mathcal{E}(j)} \sum_{j'=1}^{N_2} h_{j,j'}^{e,+} (x_{j'}^{(2)} - x_j^{(2)}) - \frac{1}{N_1} \sum_{e \in \mathcal{E}(j)} \sum_{i=1}^{N_1} h_{i,j}^{e,-} (x_i^{(1)} - x_j^{(2)}) + \delta x_j^{(2)} (1 - (x_j^{(2)})^2). \end{cases} \quad (21)$$

Set the matrix  $A^e$  as

$$A_{i,j}^e = \begin{cases} h_{i,i}^e \\ -h_{i,j}^e \end{cases} \quad (22)$$

and designate  $C^A := \min_{e \in \mathcal{E}} \{F(A^e)\}$ , where  $F(A^e)$  is the *Fiedler number* of  $A^e$ .

**Lemma B.1** ( $L_2$  estimate for  $M_2$ ). *There exists a positive constant  $M_2^\infty$  such that*

$$\sup_{0 \leq t < \infty} M_2(t) \leq M_2^\infty \leq \infty. \quad (23)$$

*Proof.* Note that  $h_{i,j}^{e,\pm} = h_{j,i}^{e,\pm}$ , then

$$\begin{aligned} \frac{d}{dt} M_2(x^{(1)}) &= \frac{2}{N_1} \sum_{i=1}^{N_1} x_i^{(1)} \dot{x}_i^{(1)} \\ &= \frac{2}{N_1} \sum_{i=1}^{N_1} \sum_{e \in \mathcal{E}(i)} \sum_{i' \in e} h_{i,i'}^{e,+} (x_{i'}^{(1)} - x_i^{(1)}) x_i^{(1)} - \frac{2}{N_1} \sum_{i=1}^{N_1} \sum_{e \in \mathcal{E}(i)} \sum_{j \in e} h_{i,j}^{e,-} (x_j^{(2)} - x_i^{(1)}) x_i^{(1)} \\ &\quad + \frac{2\delta}{N_1} \sum_{i=1}^{N_1} (x_i^{(1)})^2 (1 - (x_i^{(1)})^2) \\ &= \frac{2}{N_1} \sum_{e \in \mathcal{E}} \sum_{i,i' \in e} h_{i,i'}^{e,+} (x_{i'}^{(1)} - x_i^{(1)}) x_i^{(1)} - \frac{2}{N_1} \sum_{e \in \mathcal{E}} \sum_{i,j \in e} h_{i,j}^{e,-} (x_j^{(2)} - x_i^{(1)}) x_i^{(1)} \\ &\quad + \frac{2\delta}{N_1} \sum_{i=1}^{N_1} (x_i^{(1)})^2 (1 - (x_i^{(1)})^2) \\ &= -\frac{1}{N_1} \sum_{e \in \mathcal{E}} \sum_{i,i' \in e} h_{i,i'}^{e,+} (x_{i'}^{(1)} - x_i^{(1)})^2 - \frac{2}{N_1} \sum_{e \in \mathcal{E}} \sum_{i,j \in e} h_{i,j}^{e,-} (x_j^{(2)} - x_i^{(1)}) x_i^{(1)} \\ &\quad + \frac{2\delta}{N_1} \sum_{i=1}^{N_1} (x_i^{(1)})^2 (1 - (x_i^{(1)})^2). \end{aligned} \quad (24)$$

Similarly,

$$\begin{aligned} \frac{d}{dt} M_2(x^{(2)}) &= \frac{2}{N_2} \sum_{j=1}^{N_2} x_j^{(2)} \dot{x}_j^{(2)} \\ &= -\frac{1}{N_2} \sum_{e \in \mathcal{E}} \sum_{j,j' \in e} h_{j,j'}^{e,+} (x_{j'}^{(2)} - x_j^{(2)})^2 - \frac{2}{N_2} \sum_{e \in \mathcal{E}} \sum_{j,i \in e} h_{j,i}^{e,-} (x_i^{(1)} - x_j^{(2)}) x_j^{(2)} \\ &\quad + \frac{2\delta}{N_2} \sum_{j=1}^{N_2} (x_j^{(2)})^2 (1 - (x_j^{(2)})^2). \end{aligned} \quad (25)$$

Define the total second moment  $M_2 := M_2(x^{(1)}) + M_2(x^{(2)})$ . Its time derivative is:

$$\frac{d}{dt} M_2 = \frac{d}{dt} M_2(x^{(1)}) + \frac{d}{dt} M_2(x^{(2)}). \quad (26)$$

By discarding the non-positive squared terms (first two sums), we obtain the inequality:

$$\begin{aligned} \frac{d}{dt} M_2 &\leq -\frac{2}{N_1} \sum_{e \in \mathcal{E}} \sum_{i,j \in e} h_{i,j}^{e,-} (x_j^{(2)} - x_i^{(1)}) x_i^{(1)} - \frac{2}{N_2} \sum_{e \in \mathcal{E}} \sum_{j,i \in e} h_{j,i}^{e,-} (x_i^{(1)} - x_j^{(2)}) x_j^{(2)} \\ &\quad + \frac{2\delta}{N_1} \sum_{i=1}^{N_1} (x_i^{(1)})^2 (1 - (x_i^{(1)})^2) + \frac{2\delta}{N_2} \sum_{i=1}^{N_2} (x_i^{(2)})^2 (1 - (x_i^{(2)})^2). \end{aligned} \quad (27)$$

By the Cauchy-Schwarz inequality,

$$\begin{aligned}(M_2^{(1)})^2 &= \left( \sum_{i=1}^{N_1} (x_i^{(1)})^2 \right)^2 \leq N_1 \sum_{i=1}^{N_1} (x_i^{(1)})^4, \\ (M_2^{(2)})^2 &= \left( \sum_{i=1}^{N_2} (x_i^{(2)})^2 \right)^2 \leq N_2 \sum_{i=1}^{N_2} (x_i^{(2)})^4, \\ (x_i^{(1)} - x_j^{(2)})^2 &\leq 2((x_i^{(1)})^2 + (x_j^{(2)})^2).\end{aligned}$$

Then we have

$$\begin{aligned}& \frac{2\delta}{N_1} \sum_{i=1}^{N_1} (x_i^{(1)})^2 (1 - (x_i^{(1)})^2) + \frac{2\delta}{N_2} \sum_{i=1}^{N_2} (x_i^{(2)})^2 (1 - (x_i^{(2)})^2) \\&= \frac{2\delta}{N_1} \sum_{i=1}^{N_1} (x_i^{(1)})^2 - \frac{2\delta}{N_1} \sum_{i=1}^{N_1} (x_i^{(1)})^4 + \frac{2\delta}{N_2} \sum_{i=1}^{N_2} (x_i^{(2)})^2 - \frac{2\delta}{N_2} \sum_{i=1}^{N_2} (x_i^{(2)})^4 \\&\leq \frac{2\delta}{N_1} \sum_{i=1}^{N_1} (x_i^{(1)})^2 - \frac{2\delta}{(N_1)^2} \left( \sum_{i=1}^{N_1} (x_i^{(1)})^2 \right)^2 + \frac{2\delta}{N_2} \sum_{i=1}^{N_2} (x_i^{(2)})^2 - \frac{2\delta}{(N_2)^2} \left( \sum_{i=1}^{N_2} (x_i^{(2)})^2 \right)^2 \\&= 2\delta \left( \frac{M_2^{(1)}}{N_1} + \frac{M_2^{(2)}}{N_2} \right) - 2\delta \left( \left( \frac{M_2^{(1)}}{N_1} \right)^2 + \left( \frac{M_2^{(2)}}{N_2} \right)^2 \right) \\&\leq 2\delta \left( \frac{M_2^{(1)}}{N_1} + \frac{M_2^{(2)}}{N_2} \right) - \delta \left( \frac{M_2^{(1)}}{N_1} + \frac{M_2^{(2)}}{N_2} \right)^2 \\&\leq \frac{2\delta}{N'} M_2 - \frac{\delta}{N''} (M_2)^2,\end{aligned} \tag{28}$$

where  $N' = \min\{N_1, N_2\}$  and  $N'' = \max\{N_1, N_2\}$ .

So, we have

$$\begin{aligned}\frac{d}{dt} M_2 &\leq \frac{D^-}{N_1} \sum_{e \in \mathcal{E}} \sum_{i,j \in e} \left( (x_j^{(2)} - x_i^{(1)})^2 + (x_i^{(1)})^2 \right) + \frac{D^-}{N_2} \sum_{e \in \mathcal{E}} \sum_{j,i \in e} \left( (x_i^{(1)} - x_j^{(2)})^2 + (x_j^{(2)})^2 \right) \\&\quad + \frac{2\delta}{N_1} \sum_{i=1}^{N_1} (x_i^{(1)})^2 (1 - (x_i^{(1)})^2) + \frac{2\delta}{N_2} \sum_{i=1}^{N_2} (x_i^{(2)})^2 (1 - (x_i^{(2)})^2) \\&\leq \frac{D^-}{N_1} \sum_{e \in \mathcal{E}} \sum_{i,j \in e} \left( 3(x_i^{(1)})^2 + 2(x_j^{(2)})^2 \right) + \frac{D^-}{N_2} \sum_{e \in \mathcal{E}} \sum_{i,j \in e} \left( 2(x_i^{(1)})^2 + 3(x_j^{(2)})^2 \right) + \frac{2\delta}{N'} M_2 - \frac{\delta}{N''} M_2^2.\end{aligned} \tag{29}$$

These relations yield a Riccati-type differential inequality:

$$\begin{aligned}\frac{d}{dt} M_2 &\leq 5D^- \max\left\{ \frac{1}{N_1}, \frac{1}{N_2} \right\} \sum_{e \in \mathcal{E}} \sum_{i,j \in e} \left( (x_i^{(1)})^2 + (x_j^{(2)})^2 \right) + 2\delta M_2 - \delta (M_2)^2 \\&\leq \frac{5D^- k}{N'} M_2 + \frac{2\delta}{N'} M_2 - \frac{\delta}{N''} (M_2)^2 \\&\leq \frac{5D^- k + 2\delta}{N'} M_2 - \frac{\delta}{N''} (M_2)^2.\end{aligned} \tag{30}$$

Let  $y$  be a solution of the following ODE:

$$y' = ay - by^2. \tag{31}$$

Then, by phase line analysis, the solution  $y(t)$  to Eq. 31 satisfies

$$M_2(t) \leq y(t) \leq \max\left\{ \frac{a}{b}, M_2(0) \right\} = \max\left\{ \frac{(5D^- k + 2\delta)N''}{\delta N'}, M_2(0) \right\} =: M_2^\infty. \tag{32}$$

which yields the desired estimate. ■

**Proposition B.2.** For Eq. 4, the distance of the centers of the two clusters is finite.

*Proof of Proposition B.2.* By Lemma B.1

$$\begin{aligned}
\|\bar{x}^{(1)} - \bar{x}^{(2)}\| &= \left\| \frac{1}{N_1} \sum_{i=1}^{N_1} x_i^{(1)} - \frac{1}{N_2} \sum_{j=1}^{N_2} x_j^{(2)} \right\| \\
&\leq \sqrt{2} \sqrt{\frac{1}{N_1} \sum_{i=1}^{N_1} (x_i^{(1)})^2 + \frac{1}{N_2} \sum_{j=1}^{N_2} (x_j^{(2)})^2} \\
&\leq \sqrt{2} \sqrt{M_2^\infty},
\end{aligned} \tag{33}$$

where the first inequality used the Cauchy-Schwarz inequality. ■

**Lemma B.3.** Let  $u, v$  be the solution to Eq. 21. Then  $\|\bar{x}^{(1)} - \bar{x}^{(2)}\|^2$  satisfies

$$\frac{1}{2} \frac{d}{dt} \|\bar{x}^{(1)} - \bar{x}^{(2)}\|^2 \geq \left( \frac{2c_m}{N_0} - c_1 \right) \|\bar{x}^{(1)} - \bar{x}^{(2)}\|^2 - \frac{4(D_2^-)^2}{c_1 N_0} k \widehat{M}_2. \tag{34}$$

*Proof.* The time evolution of  $\bar{x}^{(1)}$  is given by

$$\begin{aligned}
\dot{\bar{x}}^{(1)} &= \frac{1}{N_1} \sum_{i=1}^{N_1} \sum_{i' \in \mathcal{E}(i)} h_{i,i'}^{e,+} (x_{i'}^{(1)} - x_i^{(1)}) - \frac{1}{N_1} \sum_{i=1}^{N_1} \sum_{j \in \mathcal{E}(i)} h_{j,i}^{e,-} (x_j^{(2)} - x_i^{(1)}) \\
&= -\frac{1}{N_1} \sum_{e \in \mathcal{E}} \sum_{i,j \in e} h_{i,j}^{e,-} (x_j^{(2)} - x_i^{(1)}) \\
&= -\frac{1}{N_1} \sum_{e \in \mathcal{E}} \psi_j^{e,-} x_j^{(2)} + \frac{1}{N_1} \sum_{e \in \mathcal{E}} \psi_i^{e,-} x_i^{(1)} \\
&= \sum_{e \in \mathcal{E}} \left( -\frac{1}{N_1} \psi_j^{e,-} x_j^{(2)} + \frac{1}{N_1} \psi_i^{e,-} x_i^{(1)} \right),
\end{aligned} \tag{35}$$

where the first equality uses the relation  $\sum_{i=1}^{N_1} \hat{x}_i^{(1)} = 0$ .

Then we have

$$\frac{1}{2} \frac{d}{dt} \|\bar{x}^{(1)} - \bar{x}^{(2)}\|^2 \tag{36}$$

$$= (\bar{x}^{(1)} - \bar{x}^{(2)}) (\dot{\bar{x}}^{(1)} - \dot{\bar{x}}^{(2)}) \tag{37}$$

$$= (\bar{x}^{(1)} - \bar{x}^{(2)}) \left[ \sum_{e \in \mathcal{E}} \left( -\frac{1}{N_1} \psi_j^{e,-} x_j^{(2)} + \frac{1}{N_1} \psi_i^{e,-} x_i^{(1)} \right) - \sum_{e \in \mathcal{E}} \left( -\frac{1}{N_2} \psi_i^{e,-} x_i^{(1)} + \frac{1}{N_2} \psi_j^{e,-} x_j^{(2)} \right) \right] \tag{38}$$

$$= (\bar{x}^{(1)} - \bar{x}^{(2)}) \sum_{e \in \mathcal{E}} \left( -\frac{1}{N_1} \psi_j^{e,-} x_j^{(2)} - \frac{1}{N_2} \psi_j^{e,-} x_j^{(2)} + \frac{1}{N_1} \psi_i^{e,-} x_i^{(1)} + \frac{1}{N_2} \psi_i^{e,-} x_i^{(1)} \right) \tag{39}$$

$$= (\bar{x}^{(1)} - \bar{x}^{(2)}) \sum_{e \in \mathcal{E}} \left( -\frac{1}{N_1} \psi_j^{e,-} (\bar{x}^{(2)} + \hat{x}_j^{(2)}) - \frac{1}{N_2} \psi_j^{e,-} (\bar{x}^{(2)} + \hat{x}_j^{(2)}) + \frac{1}{N_1} \psi_i^{e,-} (\bar{x}^{(1)} + \hat{x}_i^{(1)}) \right) \tag{40}$$

$$+ \frac{1}{N_2} \psi_i^{e,-} (\bar{x}^{(1)} + \hat{x}_i^{(1)}) \tag{41}$$

$$= (\bar{x}^{(1)} - \bar{x}^{(2)}) \left\{ \left[ -\left( \frac{1}{N_1} + \frac{1}{N_2} \right) \sum_{e \in \mathcal{E}} \sum_{j \in e} \psi_j^{e,-} \right] \bar{x}^{(2)} + \left[ \left( \frac{1}{N_1} + \frac{1}{N_2} \right) \sum_{e \in \mathcal{E}} \sum_{i \in e} \psi_i^{e,-} \right] \bar{x}^{(1)} \right\} \tag{42}$$

$$\left[ -\left( \frac{1}{N_1} + \frac{1}{N_2} \right) \sum_{e \in \mathcal{E}} \sum_{j \in e} \psi_j^{e,-} \right] \hat{x}_j^{(2)} + \left[ \left( \frac{1}{N_1} + \frac{1}{N_2} \right) \sum_{e \in \mathcal{E}} \sum_{i \in e} \psi_i^{e,-} \right] \hat{x}_i^{(1)} \right\} \quad (43)$$

$$= \frac{2}{N_0} (\bar{x}^{(1)} - \bar{x}^{(2)}) \left[ \sum_{e \in \mathcal{E}} \sum_{i \in e} \psi_i^{e,-} \bar{x}^{(1)} - \sum_{e \in \mathcal{E}} \sum_{j \in e} \psi_j^{e,-} \bar{x}^{(2)} \right] \quad (44)$$

$$+ \frac{2}{N_0} (\bar{x}^{(1)} - \bar{x}^{(2)}) \left[ \sum_{e \in \mathcal{E}} \sum_{i \in e} \psi_i^{e,-} \hat{x}_i^{(1)} - \sum_{e \in \mathcal{E}} \sum_{j \in e} \psi_j^{e,-} \hat{x}_j^{(2)} \right]. \quad (45)$$

We denote

$$\text{Pes}(\hat{x}^{(1)}, \hat{x}^{(2)}) := \sum_{e \in \mathcal{E}} \sum_{i \in e} \psi_i^{e,-} \hat{x}_i^{(1)} - \sum_{e \in \mathcal{E}} \sum_{j \in e} \psi_j^{e,-} \hat{x}_j^{(2)}.$$

and

$$\text{Pes}(\bar{x}^{(1)}, \bar{x}^{(2)}) := \sum_{e \in \mathcal{E}} \sum_{i \in e} \psi_i^{e,-} \bar{x}^{(1)} - \sum_{e \in \mathcal{E}} \sum_{j \in e} \psi_j^{e,-} \bar{x}^{(2)}.$$

Assume there exist constants  $c_m, c_v$ , such that

$$\text{Pes}(\bar{x}^{(1)}, \bar{x}^{(2)}) \geq c_m (\bar{x}^{(1)} - \bar{x}^{(2)}). \quad (46)$$

Then, by Cauchy's inequality, for any  $c_1$ , we have

$$\begin{aligned} & \frac{1}{2} \frac{d}{dt} \|\bar{x}^{(1)} - \bar{x}^{(2)}\|^2 \\ &= \frac{2}{N_0} \text{Pes}(\bar{x}^{(1)}, \bar{x}^{(2)}) (\bar{x}^{(1)} - \bar{x}^{(2)}) + \frac{2}{N_0} \text{Pes}(\hat{x}^{(1)}, \hat{x}^{(2)}) (\bar{x}^{(1)} - \bar{x}^{(2)}) \\ &\geq \left( \frac{2c_m}{N_0} - c_1 \right) \|\bar{x}^{(1)} - \bar{x}^{(2)}\|^2 + c_1 \|\bar{x}^{(1)} - \bar{x}^{(2)}\|^2 + \frac{2}{N_0} \text{Pes}(\hat{x}^{(1)}, \hat{x}^{(2)}) (\bar{x}^{(1)} - \bar{x}^{(2)}) \\ &\geq \left( \frac{2c_m}{N_0} - c_1 \right) \|\bar{x}^{(1)} - \bar{x}^{(2)}\|^2 - \frac{1}{c_1} \frac{2}{N_0} \left( \text{Pes}(\hat{x}^{(1)}, \hat{x}^{(2)}) \right)^2 \\ &\geq \left( \frac{2c_m}{N_0} - c_1 \right) \|\bar{x}^{(1)} - \bar{x}^{(2)}\|^2 - \frac{4}{c_1 N_0} \sum_{e \in \mathcal{E}} \left[ \left( \sum_{i \in e} \psi_i^{e,-} \hat{x}_i^{(1)} \right)^2 + \left( \sum_{j \in e} \psi_j^{e,-} \hat{x}_j^{(2)} \right)^2 \right] \\ &\geq \left( \frac{2c_m}{N_0} - c_1 \right) \|\bar{x}^{(1)} - \bar{x}^{(2)}\|^2 - \frac{4}{c_1 N_0} \sum_{e \in \mathcal{E}} \left[ \|\psi^{e,-}\|^2 \sum_{i \in e} (\hat{x}_i^{(1)})^2 + \|\psi^{e,-}\|^2 \sum_{j \in e} (\hat{x}_j^{(2)})^2 \right] \\ &\geq \left( \frac{2c_m}{N_0} - c_1 \right) \|\bar{x}^{(1)} - \bar{x}^{(2)}\|^2 - \frac{4(D_2^-)^2}{c_1 N_0} \sum_{e \in \mathcal{E}} \left[ \sum_{i \in e} (\hat{x}_i^{(1)})^2 + \sum_{j \in e} (\hat{x}_j^{(2)})^2 \right] \\ &\geq \left( \frac{2c_m}{N_0} - c_1 \right) \|\bar{x}^{(1)} - \bar{x}^{(2)}\|^2 - \frac{4(D_2^-)^2}{c_1 N_0} k[\widehat{M}_2]. \end{aligned} \quad (47)$$

■

**Lemma B.4.** Let  $u, v$  be the solution to Eq. 21. Then  $\widehat{M}_2$  satisfies

$$\frac{1}{2} \frac{d}{dt} \widehat{M}_2 \leq C_2 \widehat{M}_2 + 2c_2 \|\bar{x}^{(1)} - \bar{x}^{(2)}\|^2, \quad (48)$$

where

$$C_2 := -k \left( C^A - \frac{D^-}{2} + \frac{(D^-)^2}{4c_2} - \frac{\delta}{k} \right), \quad (49)$$

and  $c_2$  is an arbitrary positive constant.

*Proof.* Subtracting Eq. 35 from Eq. 21 gives  $\dot{\hat{x}}_i^{(1)}$ . Then we have

$$\begin{aligned}
& \frac{1}{2} \frac{d}{dt} \left( \frac{1}{N_1} \sum_{i=1}^{N_1} \|\hat{x}_i^{(1)}\|^2 \right) \\
&= \frac{1}{N_1} \sum_{i=1}^{N_1} \hat{x}_i^{(1)} \dot{\hat{x}}_i^{(1)} \\
&= \frac{1}{N_1} \sum_{i=1}^{N_1} \hat{x}_i^{(1)} \sum_{e \in \mathcal{E}(i)} \left[ \sum_{i' \in e} h_{i,i'}^{e,+} (x_{i'}^{(1)} - x_i^{(1)}) - \sum_{j \in e} h_{i,j}^{e,-} (x_j^{(2)} - x_i^{(1)}) \right] \\
&\quad + \frac{\delta}{N_1} \sum_{i=1}^{N_1} \hat{x}_i^{(1)} x_i^{(1)} (1 - (x_i^{(1)})^2) \\
&= \frac{1}{N_1} \sum_{i=1}^{N_1} \hat{x}_i^{(1)} \sum_{e \in \mathcal{E}(i)} \left[ \sum_{i' \in e} h_{i,i'}^{e,+} (\hat{x}_{i'}^{(1)} - \hat{x}_i^{(1)}) - \sum_{j \in e} h_{i,j}^{e,-} (x_j^{(2)} - x_i^{(1)}) \right] \\
&\quad + \frac{\delta}{N_1} \sum_{i=1}^{N_1} \hat{x}_i^{(1)} x_i^{(1)} (1 - (x_i^{(1)})^2) \\
&= \frac{1}{N_1} \sum_{i=1}^{N_1} \hat{x}_i^{(1)} \sum_{e \in \mathcal{E}(i)} \sum_{i' \in e} h_{i,i'}^{e,+} (\hat{x}_{i'}^{(1)} - \hat{x}_i^{(1)}) - \frac{1}{N_1} \sum_{i=1}^{N_1} \hat{x}_i^{(1)} \sum_{e \in \mathcal{E}(i)} \sum_{j \in e} h_{i,j}^{e,-} (x_j^{(2)} - \hat{x}_i^{(1)}) \\
&\quad - \frac{1}{N_1} \sum_{i=1}^{N_1} \hat{x}_i^{(1)} \sum_{e \in \mathcal{E}(i)} \sum_{j \in e} h_{i,j}^{e,-} (\bar{x}^{(2)} - \bar{x}^{(1)}) + \frac{\delta}{N_1} \sum_{i=1}^{N_1} \hat{x}_i^{(1)} x_i^{(1)} (1 - (x_i^{(1)})^2) \\
&=: I_1 + I_2 + I_3 + I_4.
\end{aligned} \tag{50}$$

$I_1$  can be defined by

$$\begin{aligned}
I_1 &= \frac{1}{N_1} \sum_{i=1}^{N_1} \hat{x}_i^{(1)} \sum_{e \in \mathcal{E}(i)} \sum_{i' \in e} h_{i,i'}^{e,+} (\hat{x}_{i'}^{(1)} - \hat{x}_i^{(1)}) \\
&= \frac{1}{N_1} \sum_{e \in \mathcal{E}} \sum_{i,i' \in e} h_{i,i'}^{e,+} (\hat{x}_{i'}^{(1)} - \hat{x}_i^{(1)}) \hat{x}_i^{(1)} \\
&= \frac{1}{N_1} \sum_{e \in \mathcal{E}} ((\hat{x}^{(1)})^e)^\top A^e (\hat{x}^{(1)})^e,
\end{aligned} \tag{51}$$

where  $(\hat{x}^{(1)})^e := (\hat{x}_{i_1}^{(1)}, \dots, \hat{x}_{i_{|e|}}^{(1)})^\top$  and  $A^e$  is given by Eq. 22 for each  $e$ . Thus  $I_1$  is bounded by

$$\frac{1}{N_1} \sum_{e \in \mathcal{E}} ((\hat{x}^{(1)})^e)^\top A^e (\hat{x}^{(1)})^e \leq -\frac{1}{N_1} \sum_{e \in \mathcal{E}} C^A \|(\hat{x}^{(1)})^e\|^2 \leq -\frac{c_r}{N_1} \sum_{i=1}^{N_1} C^A \|\hat{x}_i^{(1)}\|^2, \tag{52}$$

where  $c_r$  is a constant larger than 1 related to the repetition of  $\{\hat{x}_i^{(1)}\}$  in all hyperedges.

$I_2$  can be controlled by

$$I_2 = -\frac{1}{N_1} \sum_{i=1}^{N_1} \hat{x}_i^{(1)} \sum_{e \in \mathcal{E}(i)} \sum_{j \in e} h_{i,j}^{e,-} (\hat{x}_j^{(2)} - \hat{x}_i^{(1)}) \tag{53}$$

$$= -\frac{1}{N_1} \sum_{e \in \mathcal{E}} \sum_{i,j \in e} h_{i,j}^{e,-} (\hat{x}_j^{(2)} - \hat{x}_i^{(1)}) \hat{x}_i^{(1)} \tag{54}$$

$$= -\frac{1}{N_1} \sum_{e \in \mathcal{E}} \sum_{i,j \in e} h_{i,j}^{e,-} \hat{x}_j^{(2)} \hat{x}_i^{(1)} + \frac{1}{N_1} \sum_{e \in \mathcal{E}} \sum_{i,j \in e} h_{i,j}^{e,-} \|\hat{x}_i^{(1)}\|^2 \tag{55}$$

$$\leq \frac{1}{N_1} \sum_{e \in \mathcal{E}} \sum_{i,j \in e} h_{i,j}^{e,-} \frac{1}{2} (\|\hat{x}_j^{(2)}\|^2 + \|\hat{x}_i^{(1)}\|^2) + \frac{1}{N_1} \sum_{e \in \mathcal{E}} D_e^- \sum_{i \in e} \|\hat{x}_i^{(1)}\|^2 \quad (56)$$

$$\leq \frac{1}{2N_1} \sum_{e \in \mathcal{E}} \sum_{j \in e} \psi_j^{e,-} \|\hat{x}_j^{(2)}\|^2 + \frac{3D^-}{2N_1} \sum_{e \in \mathcal{E}} \sum_{i \in e} \|\hat{x}_j^{(1)}\|^2 \quad (57)$$

$$\leq \frac{D^-}{2N_1} \sum_{e \in \mathcal{E}} \sum_{j \in e} \|\hat{x}_j^{(2)}\|^2 + \frac{3D^-}{2N_1} \sum_{e \in \mathcal{E}} \sum_{i \in e} \|\hat{x}_j^{(1)}\|^2 \quad (58)$$

$$\leq \frac{D^- k}{2N_1} \sum_{j=1}^{N_2} \|\hat{x}_j^{(2)}\|^2 + \frac{3D^- k}{2N_1} \sum_{i=1}^{N_1} \|\hat{x}_i^{(1)}\|^2. \quad (59)$$

$I_3$  has the below estimate for any constant  $c_2 > 0$ :

$$\begin{aligned} I_3 &= -\frac{1}{N_1} \sum_{i=1}^{N_1} \hat{x}_i^{(1)} \sum_{e \in \mathcal{E}(i)} \sum_{j \in e} h_{i,j}^{e,-} (\bar{x}^{(2)} - \bar{x}^{(1)}) \\ &\leq c_2 \|\bar{x}^{(1)} - \bar{x}^{(2)}\|^2 + \frac{1}{4c_2 N_1} \sum_{e \in \mathcal{E}} \sum_{i,j \in e} \|h_{i,j}^{e,-}\|^2 \|\hat{x}_i^{(1)}\|^2 \\ &\leq c_2 \|\bar{x}^{(1)} - \bar{x}^{(2)}\|^2 + \frac{(D^-)^2}{4c_2 N_1} \sum_{e \in \mathcal{E}} \sum_{i,j \in e} \|\hat{x}_i^{(1)}\|^2 \\ &\leq c_2 \|\bar{x}^{(1)} - \bar{x}^{(2)}\|^2 + \frac{(D^-)^2 k}{4c_2 N_1} \sum_{e \in \mathcal{E}} \sum_{i=1}^{N_1} \|\hat{x}_i^{(1)}\|^2. \end{aligned} \quad (60)$$

Define

$$\begin{aligned} I_4 &:= \frac{1}{N_1} \delta \sum_{i=1}^{N_1} \hat{x}_i^{(1)} x_i^{(1)} (1 - \|x_i^{(1)}\|^2) \\ &= \frac{\delta}{N_1} \sum_{i=1}^{N_1} \hat{x}_i^{(1)} (\hat{x}_i^{(1)} + \bar{x}^{(1)}) (1 - (x_i^{(1)})^2) \\ &= \frac{\delta}{N_1} \sum_{i=1}^{N_1} (\hat{x}_i^{(1)})^2 - \frac{\delta}{N_1} \sum_{i=1}^{N_1} (\hat{x}_i^{(1)})^2 (x_i^{(1)})^2 + \frac{\delta}{N_1} \sum_{i=1}^{N_1} \hat{x}_i^{(1)} \bar{x}^{(1)} - \frac{\delta}{N_1} \sum_{i=1}^{N_1} \hat{x}_i^{(1)} (x_i^{(1)})^2 \bar{x}^{(1)} \\ &= \frac{\delta}{N_1} \sum_{i=1}^{N_1} (\hat{x}_i^{(1)})^2 - \frac{\delta}{N_1} \sum_{i=1}^{N_1} \hat{x}_i^{(1)} \|x_i^{(1)}\|^2 x_i^{(1)}. \end{aligned} \quad (61)$$

Note that

$$\begin{aligned} \sum_{i=1}^{N_1} \hat{x}_i^{(1)} \|x_i^{(1)}\|^2 x_i^{(1)} &= \sum_{i=1}^{N_1} \|x_i^{(1)}\|^2 (\|x_i^{(1)}\|^2 - x_i^{(1)} \bar{x}^{(1)}) \\ &\geq \frac{1}{2} \sum_{i=1}^{N_1} \|x_i^{(1)}\|^2 (\|x_i^{(1)}\|^2 - \|\bar{x}^{(1)}\|^2) \\ &= \frac{1}{2} \sum_{i=1}^{N_1} \|x_i^{(1)}\|^4 - \frac{1}{2} \sum_{i=1}^{N_1} \|x_i^{(1)}\|^2 \|\bar{x}^{(1)}\|^2 \\ &\geq \frac{1}{2} \sum_{i=1}^{N_1} \|x_i^{(1)}\|^4 - \frac{1}{2N_1} \sum_{i=1}^{N_1} (\|x_i^{(1)}\|^2)^2 \\ &\geq 0. \end{aligned} \quad (62)$$

Hence,

$$I_4 \leq \delta \widehat{M}_2(u). \quad (63)$$



Then

$$\begin{aligned}
& \frac{d}{dt} \left( \frac{1}{2N_1} \sum_{i=1}^{N_1} \|\hat{x}_i^{(1)}\|^2 \right) \\
& \leq k \left( -\frac{C^A}{N_1} + \frac{3D^-}{2N_1} + \frac{(D^-)^2}{4c_2N_1} \right) \sum_{i=1}^{N_1} \|\hat{x}_i^{(1)}\|^2 + k \frac{D^-}{2N_2} \sum_{j=1}^{N_2} \|\hat{x}_j^{(2)}\|^2 + c_2 \|\bar{x}^{(1)} - \bar{x}^{(2)}\|^2 \quad (64) \\
& \leq \left[ k \left( -C^A + \frac{3D^-}{2} + \frac{(D^-)^2}{4c_2} \right) + \delta \right] \widehat{M}_2(u) + k \frac{D^-}{2} \widehat{M}_2(v) + c_2 \|\bar{x}^{(1)} - \bar{x}^{(2)}\|^2.
\end{aligned}$$

Similarly,

$$\begin{aligned}
& \frac{d}{dt} \left( \frac{1}{2N_2} \sum_{j=1}^{N_2} \|\hat{x}_j^{(2)}\|^2 \right) \\
& \leq \left[ k \left( -C^A + \frac{3D^-}{2} + \frac{(D^-)^2}{4c_2} \right) + \delta \right] \widehat{M}_2(v) + k \frac{D^-}{2} \widehat{M}_2(u) + c_2 \|\bar{x}^{(1)} - \bar{x}^{(2)}\|^2. \quad (65)
\end{aligned}$$

Summing them together gives

$$\frac{1}{2} \frac{d}{dt} (\widehat{M}_2) \leq -k \left( C^A - \frac{D^-}{2} + \frac{(D^-)^2}{4c_2} - \frac{\delta}{k} \right) (\widehat{M}_2) + 2c_2 \|\bar{x}^{(1)} - \bar{x}^{(2)}\|^2. \quad (66)$$

This gives an exponential growth estimate or  $\widehat{M}_2$  up to an error term of  $\|\bar{x}^{(1)} - \bar{x}^{(2)}\|^2$ . ■

**Proposition B.5** ( $L_2$  separation of HAMP-I). *For Eq. 4, suppose the above assumptions are satisfied. Define the mean value  $\bar{\mathbf{x}} := \frac{1}{N} \sum_{i=1}^N \mathbf{x}_i$ , and the second moments  $M_2(\mathbf{x}) := \sum_{i=1}^N \mathbf{x}_i^2$ . Then for sufficiently large  $N_1, N_2$ , there exist constants  $\lambda_-, \lambda_+$ , such that if the initial data satisfies*

$$\lambda(0) := \frac{\widehat{M}_2(0)}{\|\bar{\mathbf{x}}^{(1)}(0) - \bar{\mathbf{x}}^{(2)}(0)\|^2} \leq \lambda_+, \quad (67)$$

then, there holds that the  $L_2$  separation

$$\lambda(t) := \frac{\widehat{M}_2(t)}{\|\bar{\mathbf{x}}^{(1)}(t) - \bar{\mathbf{x}}^{(2)}(t)\|^2} \leq \lambda_- + (\lambda(0) - \lambda_-)e^{-\mu t}, \quad (68)$$

with a positive constant  $\mu$ , where  $\widehat{M}_2(t) := M_2(\mathbf{x}^{(1)}(t)) + M_2(\mathbf{x}^{(2)}(t))$ .

*Proof of Proposition 5.2.* Lemma B.3 gives an exponential growth estimate of  $\|\bar{x}^{(1)} - \bar{x}^{(2)}\|^2$  up to an error term of  $\widehat{M}_2$ . If  $N_0$  is large enough, the coefficient of the error term is small.

Lemma B.4 gives an exponential growth estimate or  $\widehat{M}_2$  up to an error term of  $\|\bar{x}^{(1)} - \bar{x}^{(2)}\|^2$ . If  $N_0$  is large enough, the coefficient of the error term is small.

Set

$$A_{11} := \frac{2c_m}{N_0} - c_1, \quad A_{12} := \frac{4(D^-)^2 k}{c_1 N_0}, \quad A_{21} = 2c_2, \quad A_{22} = k \left( C^A - \frac{D^-}{2} + \frac{(D^-)^2}{4c_2} \right). \quad (69)$$

If  $N_0$  is large enough, Eq. 69 is satisfied.

$$(A_{11} + A_{12})^2 - 4A_{21}A_{12} > 0. \quad (70)$$

Apply Lemma 4.1 in [27] then we obtain the  $L_2$  separation. ■

**Remark B.6.** We can alternatively prove Theorem 5.2 by the method of [[44] Proposition 2 and 3].

**Proposition B.7** (Lower bound of the Dirichlet energy). *If the hypergraph  $\mathcal{H}$  is a connected one, for Eq. 4 with the conditions of Theorem 5.2, or for Eq. 5 with conditions of Theorem 5.1 in [19], there exists a positive lower bound of the Dirichlet energy.*

*Proof of Proposition 5.4.* The relative size between  $\|\bar{x}^{(1)} - \bar{x}^{(2)}\|^2$  and  $\widehat{M}_2$  is an indicator of group separation in the sense of  $L_2$ : if  $\|\bar{x}^{(1)} - \bar{x}^{(2)}\|^2$  is much larger than  $\widehat{M}_2$ , then the two groups are well-separated in average sense. Since the hypergraph is connected, there is a positive bound between different clusters, hence the Dirichlet energy does not decay to zero.

**Remark B.8.** The proof for the second-order system Eq. 5 can be proved in a similar way.

**Remark B.9.** The separability of Eq. 6 which is the Eq. 4 or Eq. 5 with a stochastic term also holds.

## C Experiment Details

### C.1 Dataset Details

We selected the most common hypergraph benchmark datasets, and the statistics of nine datasets across different domains are summarized in Tab. 3. The key statistics include the number of nodes, hyperedges, features, classes, average node degree  $d_v$ , average hyperedge size  $|\mathcal{E}|$ , and CE homophily [36]. These variations highlight the diversity in dataset scales and structural patterns, which may influence model performance in hypergraph-related tasks.

Table 3: The summary of data statistics.

| Dataset  | # nodes | # hyperedges | # features | # classes | avg. $d_v$ | avg. $ \mathcal{E} $ | CE homophily |
|----------|---------|--------------|------------|-----------|------------|----------------------|--------------|
| Cora     | 2708    | 1579         | 1433       | 7         | 1.767      | 3.03                 | 0.897        |
| Citeseer | 3312    | 1079         | 3703       | 6         | 1.044      | 3.200                | 0.893        |
| Pubmed   | 19717   | 7963         | 500        | 3         | 1.756      | 4.349                | 0.952        |
| Cora-CA  | 2708    | 1072         | 1433       | 7         | 1.693      | 4.277                | 0.803        |
| DBLP-CA  | 41302   | 22363        | 1425       | 6         | 2.411      | 4.452                | 0.869        |
| Congress | 1718    | 83105        | 100        | 2         | 427.237    | 8.656                | 0.555        |
| House    | 1290    | 340          | 100        | 2         | 9.181      | 34.730               | 0.509        |
| Senate   | 282     | 315          | 100        | 2         | 19.177     | 17.168               | 0.498        |
| Walmart  | 88860   | 69906        | 100        | 11        | 5.184      | 6.589                | 0.530        |

### C.2 Additional Ablation Studies

**Impact of Hidden Dimension on HAMP-I and HAMP-II.** We explore the tolerance of our model to different hidden dimensions, as shown in Tab. 4. For simplicity, we only vary the size of hidden dimension, while other parameters remain fixed. Overall, these results demonstrate the robustness of our methods with varying hidden dimensions. It is worth noting that high hidden dimension is key to achieving the best performance of HAMP.

Table 4: Impact of hidden dimension evaluated on the hypergraph datasets.

|          | HAMP-I |       |              |              | HAMP-II |       |              |       |
|----------|--------|-------|--------------|--------------|---------|-------|--------------|-------|
|          | 128    | 256   | 512          | 1024         | 128     | 256   | 512          | 1024  |
| Cora     | 80.19  | 80.55 | <b>81.18</b> | 79.85        | 79.59   | 79.54 | <b>80.80</b> | 79.60 |
| Citeseer | 73.39  | 72.89 | <b>75.22</b> | 72.40        | 73.95   | 74.36 | <b>75.33</b> | 75.19 |
| Pubmed   | 88.49  | 88.85 | <b>89.02</b> | 88.82        | 88.48   | 88.48 | <b>89.05</b> | 88.78 |
| Senate   | 63.24  | 65.35 | <b>69.44</b> | 66.62        | 63.52   | 63.10 | <b>70.14</b> | 62.96 |
| House    | 71.21  | 70.62 | 72.66        | <b>72.72</b> | 68.30   | 69.47 | <b>72.60</b> | 71.21 |

**Impact of Repulsion, Allen-Cahn Force, and Noise on HAMP-I and HAMP-II.** We summary ablation studies to investigate the individual and combined effects of repulsion  $f_\beta^-$ , Allen-Cahn force  $f_d$ , and noise  $B_t$  on both HAMP-I and HAMP-II. Tab. 5 reports the average node classification accuracy with a standard deviation across seven standard hypergraph benchmarks over 10 runs. Models with the repulsion term enabled outperform their counterparts in some dataset, indicating

enhanced ability to distinguish node representations in complex hypergraph structures. The synergy between the repulsion and Allen-Cahn terms further boosts performance, confirming that these particle system-inspired mechanisms play complementary roles. Overall, these improvement confirm the validity of the HAMP construction and further highlight the significant advantages of incorporating particle system theory into the hypergraph message passing learning process.

Table 5: Ablation studies on some standard hypergraph benchmarks. The accuracy (%) is reported with a standard deviation from 10 repetitive runs. (Key:  $f_{\beta}^{-}$ : repulsion;  $f_d$ : Allen-Cahn;  $B_t$ : noise.)

| Homophilic | $f_{\beta}^{-}$ | $f_d$ | $B_t$ | Cora              | Citeseer          | Pubmed            | Cora-CA           |
|------------|-----------------|-------|-------|-------------------|-------------------|-------------------|-------------------|
| HAMP-I     | ✗               | ✗     | ✗     | 76.09±1.22        | 70.53±1.56        | 87.98±0.38        | 83.13±1.26        |
|            | ✓               | ✗     | ✗     | 76.40±1.56        | 70.85±1.65        | 88.25±0.50        | 83.15±1.36        |
|            | ✗               | ✓     | ✗     | 80.31±1.41        | 74.83±1.70        | 88.90±0.45        | 84.77±1.16        |
|            | ✗               | ✗     | ✓     | 75.67±1.71        | 70.59±1.40        | 87.93±0.52        | 82.70±1.01        |
|            | ✓               | ✓     | ✗     | 80.49±1.26        | 74.96±1.56        | 88.87±0.40        | 85.21±1.49        |
|            | ✗               | ✓     | ✓     | 80.59±1.25        | 74.67±1.69        | 88.77±0.44        | 84.59±1.03        |
|            | ✓               | ✓     | ✓     | <b>81.18±1.30</b> | <b>75.22±1.62</b> | <b>89.02±0.49</b> | <b>85.23±1.15</b> |
| HAMP-II    | ✗               | ✗     | ✗     | 77.42±1.44        | 71.50±1.49        | 88.68±0.62        | 83.60±1.45        |
|            | ✓               | ✗     | ✗     | 77.08±1.73        | 72.20±1.14        | 88.59±0.50        | 82.95±1.35        |
|            | ✗               | ✓     | ✗     | 80.13±1.26        | 74.37±1.59        | 88.86±0.55        | 84.37±1.45        |
|            | ✗               | ✗     | ✓     | 77.18±1.61        | 71.75±1.68        | 88.68±0.59        | 82.91±1.28        |
|            | ✓               | ✓     | ✗     | 79.70±1.36        | 73.99±1.75        | 88.82±0.48        | 84.30±1.32        |
|            | ✗               | ✓     | ✓     | 79.50±1.25        | 74.25±1.28        | 88.80±0.40        | 83.31±1.44        |
|            | ✓               | ✓     | ✓     | <b>80.80±1.62</b> | <b>75.33±1.61</b> | <b>89.05±0.41</b> | <b>84.89±1.14</b> |

Table 6: Node Classification on standard hypergraph benchmarks. The accuracy (%) is reported with a standard deviation from 10 repetitive runs. (Key:  $f_{\beta}^{-}$ : repulsion;  $f_d$ : Allen-Cahn;  $B_t$ : noise.)

| Heterophilic | $f_{\beta}^{-}$ | $f_d$ | $B_t$ | Congress          | Senate            | Walmart           | House             |
|--------------|-----------------|-------|-------|-------------------|-------------------|-------------------|-------------------|
| HAMP-I       | ✗               | ✗     | ✗     | 93.51±1.08        | 60.70±8.38        | 69.64±0.35        | 70.50±1.45        |
|              | ✓               | ✗     | ✗     | 93.70±1.02        | 60.00±8.66        | 69.80±0.45        | 70.56±1.96        |
|              | ✗               | ✓     | ✗     | 94.79±1.14        | 66.76±5.44        | 69.77±0.28        | 71.55±1.53        |
|              | ✗               | ✗     | ✓     | 93.47±1.13        | 60.14±7.54        | 69.86±0.35        | 69.88±2.48        |
|              | ✓               | ✓     | ✗     | 94.58±1.25        | 67.75±8.82        | 69.76±0.37        | 71.58±1.87        |
|              | ✗               | ✓     | ✓     | 94.67±1.02        | 65.63±2.98        | 69.73±0.49        | 71.55±2.58        |
|              | ✓               | ✓     | ✓     | <b>95.09±0.79</b> | <b>69.44±6.09</b> | <b>69.90±0.38</b> | <b>72.72±1.77</b> |
| HAMP-II      | ✗               | ✗     | ✗     | 94.79±0.73        | 58.73±7.03        | 69.84±0.25        | 69.85±1.61        |
|              | ✓               | ✗     | ✗     | 94.02±1.10        | 61.55±5.98        | 69.91±0.30        | 69.35±1.87        |
|              | ✗               | ✓     | ✗     | 94.19±1.07        | 62.82±6.44        | 69.89±0.31        | 70.96±2.06        |
|              | ✗               | ✗     | ✓     | 94.35±1.14        | 60.14±5.10        | 69.84±0.37        | 70.46±2.08        |
|              | ✓               | ✓     | ✗     | 94.58±0.86        | 61.97±8.42        | 69.92±0.33        | 71.36±1.68        |
|              | ✗               | ✓     | ✓     | 94.12±0.63        | 64.51±4.19        | 69.86±0.34        | 70.96±2.76        |
|              | ✓               | ✓     | ✓     | <b>95.26±1.34</b> | <b>70.14±6.08</b> | <b>69.94±0.37</b> | <b>72.60±1.23</b> |

### C.3 Time-Memory Tradeoff Analysis

We intuitively reveal the differences of different methods with a single-layer network in the time-memory trade-off on Walmart dataset. As shown in Fig. 5, HAMP-I and HAMP-II methods demonstrate a notable trade-off between time efficiency and memory consumption. The experimental results reveal:

- Memory usage: HAMP-I and HAMP-II maintain memory consumption within 11000-12000 MiB, achieving a 20-26% reduction compared to ED-HNN, while being comparable to  $HDS^{ode}$ .
- Time efficiency: Although the time consumption for HAMP-I and HAMP-II runtime slightly exceeds ED-HNN (0.1s), it outperforms the baseline  $HDS^{ode}$ .

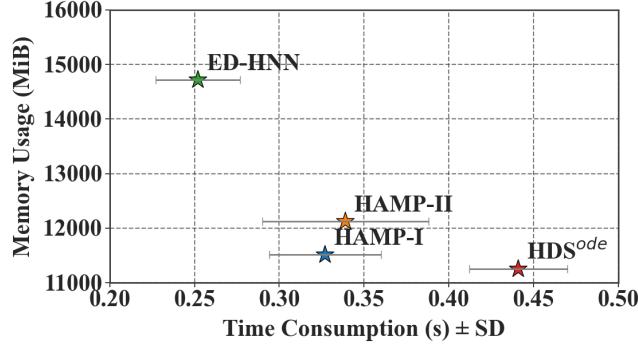

Figure 5: Time-Memory tradeoff analysis of different methods on Walmart dataset. SD denotes the standard deviation of time consumption.

#### C.4 Hyperparameters

To ensure fairness, we follow the same training recipe as ED-HNN. Specifically, we train the model for 500 epochs using the Adam optimizer with the learning rate of 0.001 and no weight decay during the training phases. And we apply early stopping with a patience of 50. For the stability, we run 10 trials with different seed and report the results of mean and the standard deviation. All experiments are implemented on an NVIDIA RTX 4090 GPU with Pytorch.

We explore the parameter space by grid search, where the search ranges for each critical hyperparameter are delineated below:

- Dropout rate in {0.1, 0.2, 0.3, 0.4, 0.5, 0.6, 0.7, 0.8, 0.9};
- Layer number of classifier in {1, 2, 3};
- The hidden dimension of classifier in {128, 256, 512};
- Hidden dimension of model in {128, 256, 512, 1024};
- step size of solver in {0.09, 0.1, 0.15, 0.2, 0.25};
- $\gamma$  of repulsive force in {0.01, 0.02, 0.03, 0.04, 0.05, 0.06, 0.07, 0.08, 0.09, 0.1, 0.11, 0.12, 0.13, 0.14, 0.15};
- Initial values of learnable parameters  $\delta$  of damping term in {0, 1, 2, 3, 4, 5, 6, 7, 8, 9, 10, 11, 12, 13, 14, 15};
- Initial values of learnable parameters  $\epsilon$  of noise term in {0, 0.1, 0.3};

Tab. 7 and Tab. 8 summarize the best hyperparameters on standard hypergraph benchmarks using HAMP-I and HAMP-II, respectively. For fairness, a linear layer is added to perform feature mapping when conducting HDS<sup>ode</sup> experiments. The optimal hyperparameters for node classification on standard hypergraph benchmarks is achieved by the HDS<sup>ode</sup> algorithm, as demonstrated in Tab. 9.

Table 7: The best hyperparameters of Node Classification on standard hypergraph benchmarks using the HAMP-I algorithm.

| Dataset  | model. hd | cls. hd and # layers | time | step size | $\delta$ | $\gamma$ | dropout | $\epsilon$ |
|----------|-----------|----------------------|------|-----------|----------|----------|---------|------------|
| Cora     | 512       | 128, 1               | 1    | 0.1       | 12       | 0.05     | 0.4     | 0          |
| Citeseer | 512       | 512, 1               | 0.6  | 0.1       | 6        | 0.05     | 0.2     | 0          |
| Pubmed   | 512       | 256, 1               | 0.2  | 0.1       | 15       | 0.1      | 0.5     | 0          |
| Cora-CA  | 512       | 512, 2               | 0.4  | 0.2       | 4        | 0.05     | 0.9     | 0          |
| DBLP-CA  | 256       | 128, 2               | 1.1  | 0.1       | 11       | 0.12     | 0.2     | 0          |
| Congress | 128       | 128, 2               | 1.4  | 0.1       | 1        | 0.08     | 0.3     | 0          |
| House    | 1024      | 512, 3               | 1.05 | 0.15      | 3        | 0.05     | 0.8     | 0          |
| Senate   | 512       | 256, 2               | 0.6  | 0.1       | 10       | 0.05     | 0.7     | 0          |
| Walmart  | 256       | 128, 2               | 1.75 | 0.25      | 0        | 0.02     | 0.3     | 0          |

Table 8: The best hyperparameters of Node Classification on standard hypergraph benchmarks using the HAMP-II algorithm.

| Dataset  | model. hd | cls. hd and layers | time | step size | $\delta$ | $\gamma$ | dropout | $\epsilon$ |
|----------|-----------|--------------------|------|-----------|----------|----------|---------|------------|
| Cora     | 512       | 512, 1             | 1.9  | 0.1       | 5        | 0.12     | 0.3     | 0.1        |
| Citeseer | 512       | 512, 1             | 1.8  | 0.15      | 8        | 0.13     | 0.6     | 0          |
| Pubmed   | 512       | 256, 1             | 0.6  | 0.09      | 5        | 0.09     | 0.3     | 0          |
| Cora-CA  | 512       | 128, 2             | 0.75 | 0.25      | 3        | 0.01     | 0.7     | 0          |
| DBLP-CA  | 256       | 128, 2             | 3.45 | 0.15      | 7        | 0.09     | 0.3     | 0          |
| Congress | 128       | 128, 2             | 6.25 | 0.25      | 0        | 0.01     | 0.3     | 0          |
| House    | 512       | 256, 2             | 1.6  | 0.1       | 8        | 0.14     | 0.8     | 0          |
| Senate   | 512       | 256, 2             | 3    | 0.2       | 13       | 0.05     | 0.3     | 0.3        |
| Walmart  | 256       | 128, 2             | 2.5  | 0.25      | 0        | 0.02     | 0.3     | 0          |

Table 9: The best hyperparameters of Node Classification on standard hypergraph benchmarks using the HDS<sup>ode</sup> algorithm.

| Dataset  | model. hd | cls. hd and layers | # layer model. | $\alpha_v$ | $\alpha_e$ | step |
|----------|-----------|--------------------|----------------|------------|------------|------|
| Cora     | 512       | 256, 2             | 10             | 0.05       | 0.9        | 20   |
| Citeseer | 512       | 512, 1             | 5              | 0.05       | 0.9        | 20   |
| Pubmed   | 512       | 256, 1             | 12             | 0.05       | 0.9        | 20   |
| Cora-CA  | 512       | 512, 2             | 9              | 0.05       | 0.9        | 20   |
| DBLP-CA  | 256       | 256, 2             | 15             | 0.05       | 0.9        | 20   |
| Congress | 256       | 128, 2             | 7              | 0.25       | 0.9        | 5    |
| House    | 512       | 256, 2             | 10             | 0.05       | 0.9        | 20   |
| Senate   | 512       | 256, 2             | 9              | 0.05       | 0.9        | 20   |
| Walmart  | 256       | 128, 2             | 6              | 0.25       | 0.9        | 5    |
